# Supplementary material for: Insights into HONO sources from observations during a solar eclipse
Source: Royal Society of Chemistry journal article supplement (doi:10.1039/d1ea00010a), 2021-01-01
Supplement: d1ea00010a1.pdf [file d1ea00010a1.pdf]

Supporting information for

**Insights into HONO sources from observations during a solar eclipse**

Ajit Singh<sup>1</sup>, Leigh R. Crilley<sup>2</sup>, William J. Bloss<sup>1\*</sup> and Francis D. Pope<sup>1</sup>

<sup>1</sup>School of Geography, Earth and Environmental Sciences, University of Birmingham,  
Birmingham, B15 2TT, UK

<sup>2</sup>Department of Chemistry, York University, Toronto, Canada

\*Corresponding author: William J. Bloss ([W.J.Bloss@bham.ac.uk](mailto:W.J.Bloss@bham.ac.uk))

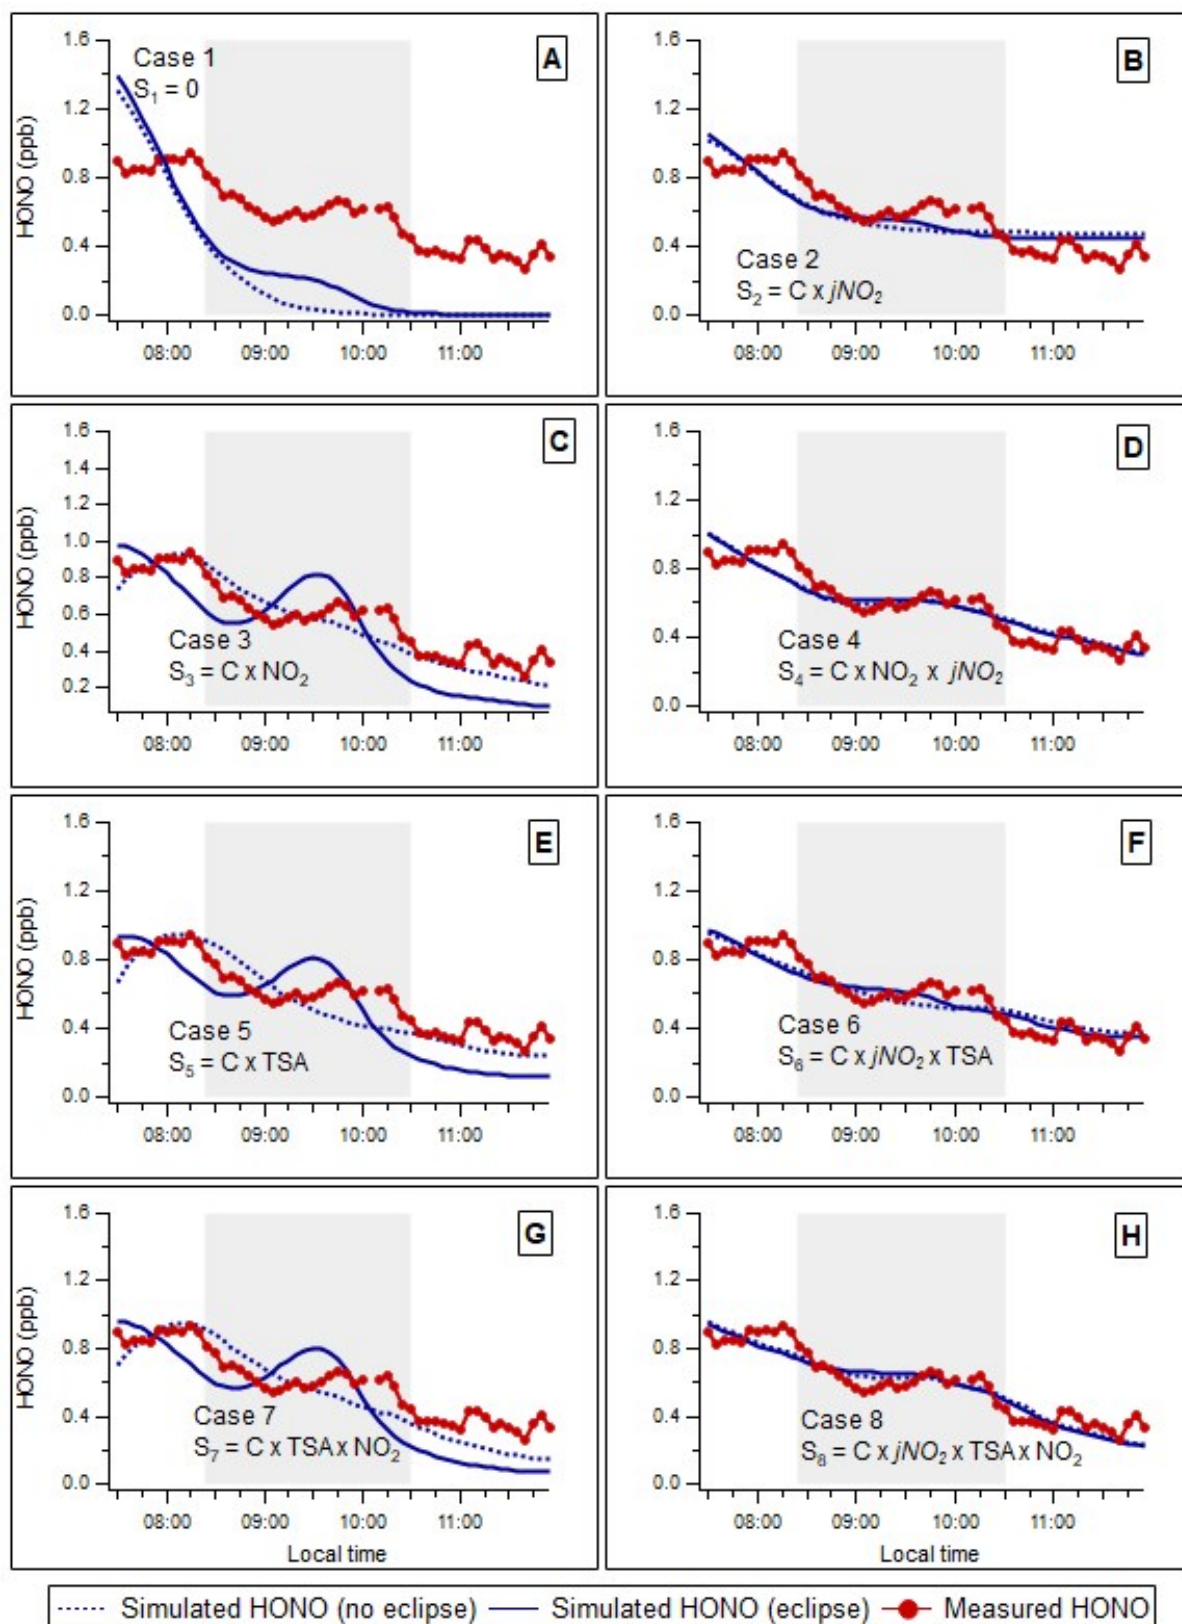

**Figure S1** Comparison between measured (red points) and calculated HONO mixing ratio during the solar eclipse, using actual eclipse photolysis frequencies (solid blue line) and (hypothetical) non-eclipse photolysis frequencies (dotted blue line). Fitting optimised throughout the pre-eclipse hour, eclipse period, and post-eclipse hour. Shading indicates eclipse duration from first to last contact. Source scenarios as defined in Table 1.

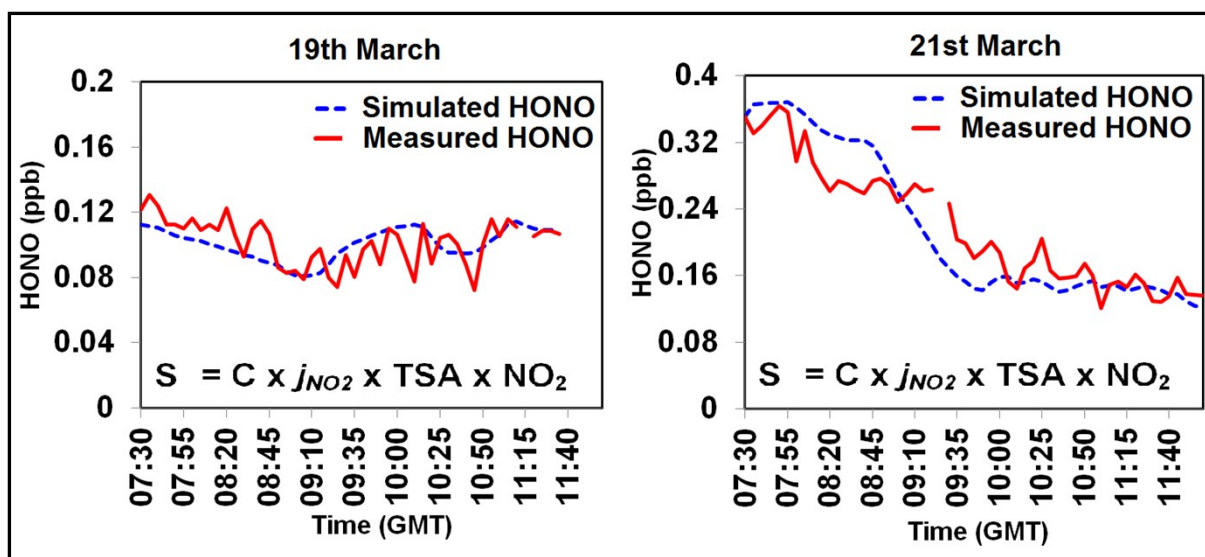

**Figure S2** Comparison between simulated HONO and measured HONO for days preceding and following the eclipse.
